# Supplementary material for: Association Between Receipt of Overlapping Opioid and Benzodiazepine Prescriptions From Multiple Prescribers and Overdose Risk
Source: PubMed Central journal article supplement (PMC8356065; doi:10.1001/jamanetworkopen.2021.20353), 2021-08-10
Supplement: jamanetwopen-e2120353-s001.pdf [file jamanetwopen-e2120353-s001.pdf]

## Supplemental Online Content

Chua KP, Brummett CM, Ng S, Bohnert ASB. Association between receipt of overlapping opioid and benzodiazepine prescriptions from multiple prescribers and overdose risk. *JAMA Netw Open*. 2021;4(8):e2120353. doi:10.1001/jamanetworkopen.2021.20353

**eAppendix 1.** Opioids and Benzodiazepines Included in Analyses

**eTable 1.** Diagnosis Codes Used to Define Opioid And Benzodiazepine Poisoning

**eTable 2.** Morphine Milligram Equivalent Conversion Factors Used in Analyses

**eAppendix 2.** Diagnosis Codes Used to Define Comorbidities

**eAppendix 3.** Prescriber Types

**eTable 3.** Adjusted Association Between Overlapping Opioid and Benzodiazepine Prescriptions From Multiple Prescribers and Overdose

**eTable 4.** Sensitivity Analyses

This supplemental material has been provided by the authors to give readers additional information about their work.

## **eAppendix 1. Opioids and Benzodiazepines Included in Analyses**

### **Opioid analgesics**

Opioid analgesics included buprenorphine, butorphanol, codeine, dihydrocodeine, fentanyl, hydrocodone, hydromorphone, levomethadyl, levorphanol, methadone, meperidine, morphine, opium, oxycodone, oxymorphone, pentazocine, propoxyphene, tapentadol, and tramadol. We excluded opioid cough-and-cold products.

### **Benzodiazepines**

Benzodiazepines included alprazolam, bromazepam, broritzolam, chlordiazepoxide, clobazam, clonazepam, clorazepate, diazepam, ethyl loflazepate, estazolam, flunitrazepam, flurazepam, halazepam, lorazepam, medazepam, nitrazepam, nordazepam, oxazepam, prazepam, quazepam, temazepam, triazolam, triazulenone, and tofisopam. We excluded midazolam, which is uncommonly used in the outpatient setting outside of emergency departments (e.g., procedural sedation).

**eTable 1.** Diagnosis Codes Used to Define Opioid And Benzodiazepine Poisoning

| <b>ICD-10-CM code</b> | <b>Description</b>                     |
|-----------------------|----------------------------------------|
| T400X1- T400X4        | Poisoning by opium                     |
| T402X1- T402X4        | Poisoning by other opioids             |
| T403X1- T403X4        | Poisoning by methadone                 |
| T404X1- T404X4        | Poisoning by other synthetic narcotics |
| T40601- T40604        | Poisoning by unspecified narcotics     |
| T40691- T40694        | Poisoning by other narcotics           |
| T424X1-T424X4         | Poisoning by benzodiazepines           |

**eTable 2.** Morphine Milligram Equivalent Conversion Factors Used in Analyses

| <b><u>Type of Opioid (strength units)</u></b>          | <b><u>MME Conversion Factor</u></b> |
|--------------------------------------------------------|-------------------------------------|
| Buprenorphine film/tablet (mg)                         | 30                                  |
| Buprenorphine patch (mcg/hr)                           | 12.6                                |
| Buprenorphine film (mcg)                               | 0.03                                |
| Butorphanol (mg)                                       | 7                                   |
| Codeine (mg)                                           | 0.15                                |
| Dihydrocodeine (mg)                                    | 0.25                                |
| Fentanyl buccal or SL tablets, or lozenge/troche (mcg) | 0.13                                |
| Fentanyl film or oral spray (mcg)                      | 0.18                                |
| Fentanyl nasal spray (mcg)                             | 0.16                                |
| Fentanyl patch (mcg)                                   | 7.2                                 |
| Hydrocodone (mg)                                       | 1                                   |
| Hydromorphone (mg)                                     | 4                                   |
| Levorphanol tartrate (mg)                              | 11                                  |
| Meperidine hydrochloride (mg)                          | 0.1                                 |
| Methadone (mg)                                         | 3                                   |
| Morphine (mg)                                          | 1                                   |
| Opium (mg)                                             | 1                                   |
| Oxycodone (mg)                                         | 1.5                                 |
| Oxymorphone (mg)                                       | 3                                   |
| Pentazocine (mg)                                       | 0.37                                |
| Tapentadol (mg)                                        | 0.4                                 |
| Tramadol (mg)                                          | 0.1                                 |

Source: <https://www.cms.gov/Medicare/Prescription-Drug-Coverage/PrescriptionDrugCovContra/Downloads/Opioid-Morphine-EQ-Conversion-Factors-Aug-2017.pdf>

## eAppendix 2. Diagnosis Codes Used to Define Comorbidities

### Cancer

C00-D09, D37-D49 (not D3A, benign neuroendocrine tumors)

### Mental health conditions

For both mental health conditions and substance use disorders, diagnosis codes were based on a slightly modified version of the Agency for Healthcare Research and Quality Clinical Classifications Software diagnosis code grouping algorithm.

| ICD-10-CM code | Description                                                                                      |
|----------------|--------------------------------------------------------------------------------------------------|
| F01            | Vascular dementia                                                                                |
| F02            | Dementia in other diseases classified elsewhere                                                  |
| F03            | Unspecified dementia                                                                             |
| F04            | Amnesic disorder due to known physiological condition                                            |
| F05            | Delirium due to known physiological condition                                                    |
| F06            | Other mental disorders due to known physiological condition                                      |
| F07            | Personality and behavioral disorders due to known physiological condition                        |
| F21            | Schizotypal disorder                                                                             |
| F22            | Delusional disorders                                                                             |
| F23            | Brief psychotic disorder                                                                         |
| F24            | Shared psychotic disorder                                                                        |
| F25            | Schizoaffective disorders                                                                        |
| F28            | Other psychotic disorder not due to a substance or known physiological condition                 |
| F29            | Unspecified psychosis not due to a substance or known physiological condition                    |
| F30            | Manic episode                                                                                    |
| F31            | Bipolar disorder                                                                                 |
| F32            | Major depressive disorder, single episode                                                        |
| F33            | Major depressive disorder, recurrent                                                             |
| F34            | Persistent mood [affective] disorders                                                            |
| F39            | Unspecified mood [affective] disorder                                                            |
| F40            | Phobic anxiety disorders                                                                         |
| F41            | Other anxiety disorders                                                                          |
| F42            | Obsessive-compulsive disorder                                                                    |
| F43            | Reaction to severe stress, and adjustment disorders                                              |
| F44            | Dissociative and conversion disorders                                                            |
| F45            | Somatoform disorders                                                                             |
| F48            | Other nonpsychotic mental disorders                                                              |
| F50            | Eating disorders                                                                                 |
| F51            | Sleep disorders not due to a substance or known physiological condition                          |
| F52            | Sexual dysfunction not due to a substance or known physiological condition                       |
| F53            | Puerperal psychosis                                                                              |
| F54            | Psychological and behavioral factors associated with disorders or diseases classified elsewhere  |
| F59            | Unspecified behavioral syndromes associated with physiological disturbances and physical factors |
| F60            | Specific personality disorders                                                                   |
| F63            | Impulse disorders                                                                                |

|                                                                                    |                                                                                                    |
|------------------------------------------------------------------------------------|----------------------------------------------------------------------------------------------------|
| F64                                                                                | Gender identity disorders                                                                          |
| F65                                                                                | Paraphilias                                                                                        |
| F66                                                                                | Other sexual disorders                                                                             |
| F68                                                                                | Other disorders of adult personality and behavior                                                  |
| F69                                                                                | Unspecified disorder of adult personality and behavior                                             |
| F70                                                                                | Mild intellectual disabilities                                                                     |
| F71                                                                                | Moderate intellectual disabilities                                                                 |
| F72                                                                                | Severe intellectual disabilities                                                                   |
| F73                                                                                | Profound intellectual disabilities                                                                 |
| F78                                                                                | Other intellectual disabilities                                                                    |
| F79                                                                                | Unspecified intellectual disabilities                                                              |
| F80                                                                                | Specific developmental disorders of speech and language                                            |
| F81                                                                                | Specific developmental disorders of scholastic skills                                              |
| F82                                                                                | Specific developmental disorder of motor function                                                  |
| F84                                                                                | Pervasive developmental disorders                                                                  |
| F88                                                                                | Other disorders of psychological development                                                       |
| F89                                                                                | Unspecified disorder of psychological development                                                  |
| F90                                                                                | Attention-deficit hyperactivity disorders                                                          |
| F91                                                                                | Conduct disorders                                                                                  |
| F93                                                                                | Emotional disorders with onset specific to childhood                                               |
| F94                                                                                | Disorders of social functioning with onset specific to childhood and adolescence                   |
| F95                                                                                | Tic disorder                                                                                       |
| F98                                                                                | Other behavioral and emotional disorders with onset usually occurring in childhood and adolescence |
| F99                                                                                | Mental disorder, not otherwise specified                                                           |
| O906                                                                               | Postpartum mood disturbance                                                                        |
| R37                                                                                | Sexual dysfunction, unspecified                                                                    |
| R45                                                                                | Symptoms and signs involving emotional state                                                       |
| R46                                                                                | Symptoms and signs involving appearance and behavior                                               |
| T1491                                                                              | Suicide attempt                                                                                    |
| T36-T39, T405X2, T407X2, T408X2, T41-T71 and X71-X83 (intentional self-harm codes) | Intentional self-harm                                                                              |
| Z6281                                                                              | Personal history of abuse in childhood                                                             |
| Z690                                                                               | Encounter for mental health services for child abuse problems                                      |
| Z6902                                                                              | Encounter for mental health services for non-parental child abuse                                  |
| Z691                                                                               | Encounter for mental health services for spousal or partner abuse problems                         |
| Z698                                                                               | Encounter for mental health services for victim or perpetrator of other abuse                      |
| Z7281                                                                              | Antisocial behavior                                                                                |
| Z865                                                                               | Personal history of mental and behavioral disorders                                                |
| Z914                                                                               | Personal history of psychological trauma, not elsewhere classified                                 |
| Z915                                                                               | Personal history of self-harm                                                                      |

### **Substance use disorders**

| ICD-10-CM code                                                                            | Description                                                                                                                                                        |
|-------------------------------------------------------------------------------------------|--------------------------------------------------------------------------------------------------------------------------------------------------------------------|
| F10-F16; F18-F19<br>(except for codes for uncomplicated use and uncomplicated dependence) | Disorders related to alcohol, opioids, cannabis, sedative/hypnotic/anxiolytics, cocaine, other stimulants, hallucinogens, inhalants, other psychoactive substances |
| G312                                                                                      | Abuse of non-psychoactive substances                                                                                                                               |
| G312                                                                                      | Degeneration of nervous system due to alcohol                                                                                                                      |
| G621                                                                                      | Alcoholic polyneuropathy                                                                                                                                           |
| I426                                                                                      | Alcoholic cardiomyopathy                                                                                                                                           |
| K2920                                                                                     | Alcoholic gastritis without bleeding                                                                                                                               |
| K2921                                                                                     | Alcoholic gastritis with bleeding                                                                                                                                  |
| K700                                                                                      | Alcoholic fatty liver                                                                                                                                              |
| K7010                                                                                     | Alcoholic hepatitis without ascites                                                                                                                                |
| K7011                                                                                     | Alcoholic hepatitis with ascites                                                                                                                                   |
| K702                                                                                      | Alcoholic fibrosis and sclerosis of liver                                                                                                                          |
| K7030                                                                                     | Alcoholic cirrhosis of liver without ascites                                                                                                                       |
| K7031                                                                                     | Alcoholic cirrhosis of liver with ascites                                                                                                                          |
| K7040                                                                                     | Alcoholic hepatic failure without coma                                                                                                                             |
| K7041                                                                                     | Alcoholic hepatic failure with coma                                                                                                                                |
| K709                                                                                      | Alcoholic liver disease, unspecified                                                                                                                               |
| O354XX0                                                                                   | Maternal care for (suspected) damage to fetus from alcohol, not applicable or unspecified                                                                          |
| O354XX1                                                                                   | Maternal care for (suspected) damage to fetus from alcohol, fetus 1                                                                                                |
| O354XX2                                                                                   | Maternal care for (suspected) damage to fetus from alcohol, fetus 2                                                                                                |
| O354XX3                                                                                   | Maternal care for (suspected) damage to fetus from alcohol, fetus 3                                                                                                |
| O354XX4                                                                                   | Maternal care for (suspected) damage to fetus from alcohol, fetus 4                                                                                                |
| O354XX5                                                                                   | Maternal care for (suspected) damage to fetus from alcohol, fetus 5                                                                                                |
| O354XX9                                                                                   | Maternal care for (suspected) damage to fetus from alcohol, other fetus                                                                                            |
| O355XX0                                                                                   | Maternal care for (suspected) damage to fetus by drugs, not applicable or unspecified                                                                              |
| O355XX1                                                                                   | Maternal care for (suspected) damage to fetus by drugs, fetus 1                                                                                                    |
| O355XX2                                                                                   | Maternal care for (suspected) damage to fetus by drugs, fetus 2                                                                                                    |
| O355XX3                                                                                   | Maternal care for (suspected) damage to fetus by drugs, fetus 3                                                                                                    |
| O355XX4                                                                                   | Maternal care for (suspected) damage to fetus by drugs, fetus 4                                                                                                    |
| O355XX5                                                                                   | Maternal care for (suspected) damage to fetus by drugs, fetus 5                                                                                                    |
| O355XX9                                                                                   | Maternal care for (suspected) damage to fetus by drugs, other fetus                                                                                                |
| O99310                                                                                    | Alcohol use complicating pregnancy, unspecified trimester                                                                                                          |
| O99311                                                                                    | Alcohol use complicating pregnancy, first trimester                                                                                                                |
| O99312                                                                                    | Alcohol use complicating pregnancy, second trimester                                                                                                               |
| O99313                                                                                    | Alcohol use complicating pregnancy, third trimester                                                                                                                |
| O99314                                                                                    | Alcohol use complicating childbirth                                                                                                                                |
| O99315                                                                                    | Alcohol use complicating the puerperium                                                                                                                            |
| O99320                                                                                    | Drug use complicating pregnancy, unspecified trimester                                                                                                             |
| O99321                                                                                    | Drug use complicating pregnancy, first trimester                                                                                                                   |
| O99322                                                                                    | Drug use complicating pregnancy, second trimester                                                                                                                  |
| O99323                                                                                    | Drug use complicating pregnancy, third trimester                                                                                                                   |
| O99324                                                                                    | Drug use complicating childbirth                                                                                                                                   |

|         |                                                                              |
|---------|------------------------------------------------------------------------------|
| O99325  | Drug use complicating the puerperium                                         |
| T400X1D | Poisoning by opium, accidental (unintentional), subsequent encounter         |
| T400X1S | Poisoning by opium, accidental (unintentional), sequela                      |
| T400X2A | Poisoning by opium, intentional self-harm, initial encounter                 |
| T400X2D | Poisoning by opium, intentional self-harm, subsequent encounter              |
| T400X2S | Poisoning by opium, intentional self-harm, sequela                           |
| T400X3A | Poisoning by opium, assault, initial encounter                               |
| T400X3D | Poisoning by opium, assault, subsequent encounter                            |
| T400X3S | Poisoning by opium, assault, sequela                                         |
| T400X4A | Poisoning by opium, undetermined, initial encounter                          |
| T400X4D | Poisoning by opium, undetermined, subsequent encounter                       |
| T400X4S | Poisoning by opium, undetermined, sequela                                    |
| T400X5A | Adverse effect of opium, initial encounter                                   |
| T400X5D | Adverse effect of opium, subsequent encounter                                |
| T400X5S | Adverse effect of opium, sequela                                             |
| T401X1A | Poisoning by heroin, accidental (unintentional), initial encounter           |
| T401X1D | Poisoning by heroin, accidental (unintentional), subsequent encounter        |
| T401X1S | Poisoning by heroin, accidental (unintentional), sequela                     |
| T401X2A | Poisoning by heroin, intentional self-harm, initial encounter                |
| T401X2D | Poisoning by heroin, intentional self-harm, subsequent encounter             |
| T401X2S | Poisoning by heroin, intentional self-harm, sequela                          |
| T401X3A | Poisoning by heroin, assault, initial encounter                              |
| T401X3D | Poisoning by heroin, assault, subsequent encounter                           |
| T401X3S | Poisoning by heroin, assault, sequela                                        |
| T401X4A | Poisoning by heroin, undetermined, initial encounter                         |
| T401X4D | Poisoning by heroin, undetermined, subsequent encounter                      |
| T401X4S | Poisoning by heroin, undetermined, sequela                                   |
| T402X1A | Poisoning by other opioids, accidental (unintentional), initial encounter    |
| T402X1D | Poisoning by other opioids, accidental (unintentional), subsequent encounter |
| T402X1S | Poisoning by other opioids, accidental (unintentional), sequela              |
| T402X2A | Poisoning by other opioids, intentional self-harm, initial encounter         |
| T402X2D | Poisoning by other opioids, intentional self-harm, subsequent encounter      |
| T402X2S | Poisoning by other opioids, intentional self-harm, sequela                   |
| T402X3A | Poisoning by other opioids, assault, initial encounter                       |
| T402X3D | Poisoning by other opioids, assault, subsequent encounter                    |
| T402X3S | Poisoning by other opioids, assault, sequela                                 |
| T402X4A | Poisoning by other opioids, undetermined, initial encounter                  |
| T402X4D | Poisoning by other opioids, undetermined, subsequent encounter               |
| T402X4S | Poisoning by other opioids, undetermined, sequela                            |
| T402X5A | Adverse effect of other opioids, initial encounter                           |
| T402X5D | Adverse effect of other opioids, subsequent encounter                        |
| T402X5S | Adverse effect of other opioids, sequela                                     |
| T403X1A | Poisoning by methadone, accidental (unintentional), initial encounter        |
| T403X1D | Poisoning by methadone, accidental (unintentional), subsequent encounter     |
| T403X1S | Poisoning by methadone, accidental (unintentional), sequela                  |



|         |                                                                                          |
|---------|------------------------------------------------------------------------------------------|
| T403X2A | Poisoning by methadone, intentional self-harm, initial encounter                         |
| T403X2D | Poisoning by methadone, intentional self-harm, subsequent encounter                      |
| T403X2S | Poisoning by methadone, intentional self-harm, sequela                                   |
| T403X3A | Poisoning by methadone, assault, initial encounter                                       |
| T403X3D | Poisoning by methadone, assault, subsequent encounter                                    |
| T403X3S | Poisoning by methadone, assault, sequela                                                 |
| T403X4A | Poisoning by methadone, undetermined, initial encounter                                  |
| T403X4D | Poisoning by methadone, undetermined, subsequent encounter                               |
| T403X4S | Poisoning by methadone, undetermined, sequela                                            |
| T403X5A | Adverse effect of methadone, initial encounter                                           |
| T403X5D | Adverse effect of methadone, subsequent encounter                                        |
| T403X5S | Adverse effect of methadone, sequela                                                     |
| T404X1A | Poisoning by other synthetic narcotics, accidental (unintentional), initial encounter    |
| T404X1D | Poisoning by other synthetic narcotics, accidental (unintentional), subsequent encounter |
| T404X1S | Poisoning by other synthetic narcotics, accidental (unintentional), sequela              |
| T404X2A | Poisoning by other synthetic narcotics, intentional self-harm, initial encounter         |
| T404X2D | Poisoning by other synthetic narcotics, intentional self-harm, subsequent encounter      |
| T404X2S | Poisoning by other synthetic narcotics, intentional self-harm, sequela                   |
| T404X3A | Poisoning by other synthetic narcotics, assault, initial encounter                       |
| T404X3D | Poisoning by other synthetic narcotics, assault, subsequent encounter                    |
| T404X3S | Poisoning by other synthetic narcotics, assault, sequela                                 |
| T404X4A | Poisoning by other synthetic narcotics, undetermined, initial encounter                  |
| T404X4D | Poisoning by other synthetic narcotics, undetermined, subsequent encounter               |
| T404X4S | Poisoning by other synthetic narcotics, undetermined, sequela                            |
| T404X5A | Adverse effect of other synthetic narcotics, initial encounter                           |
| T404X5D | Adverse effect of other synthetic narcotics, subsequent encounter                        |
| T404X5S | Adverse effect of other synthetic narcotics, sequela                                     |
| T405X1A | Poisoning by cocaine, accidental (unintentional), initial encounter                      |
| T405X1D | Poisoning by cocaine, accidental (unintentional), subsequent encounter                   |
| T405X1S | Poisoning by cocaine, accidental (unintentional), sequela                                |
| T405X2A | Poisoning by cocaine, intentional self-harm, initial encounter                           |
| T405X2D | Poisoning by cocaine, intentional self-harm, subsequent encounter                        |
| T405X2S | Poisoning by cocaine, intentional self-harm, sequela                                     |
| T405X3A | Poisoning by cocaine, assault, initial encounter                                         |
| T405X3D | Poisoning by cocaine, assault, subsequent encounter                                      |
| T405X3S | Poisoning by cocaine, assault, sequela                                                   |
| T405X4A | Poisoning by cocaine, undetermined, initial encounter                                    |
| T405X4D | Poisoning by cocaine, undetermined, subsequent encounter                                 |
| T405X4S | Poisoning by cocaine, undetermined, sequela                                              |
| T405X5A | Adverse effect of cocaine, initial encounter                                             |
| T405X5D | Adverse effect of cocaine, subsequent encounter                                          |
| T405X5S | Adverse effect of cocaine, sequela                                                       |
| T40601A | Poisoning by unspecified narcotics, accidental (unintentional), initial encounter        |
| T40601D | Poisoning by unspecified narcotics, accidental (unintentional), subsequent encounter     |
| T40601S | Poisoning by unspecified narcotics, accidental (unintentional), sequela                  |

|         |                                                                                       |
|---------|---------------------------------------------------------------------------------------|
| T40602A | Poisoning by unspecified narcotics, intentional self-harm, initial encounter          |
| T40602D | Poisoning by unspecified narcotics, intentional self-harm, subsequent encounter       |
| T40602S | Poisoning by unspecified narcotics, intentional self-harm, sequela                    |
| T40603A | Poisoning by unspecified narcotics, assault, initial encounter                        |
| T40603D | Poisoning by unspecified narcotics, assault, subsequent encounter                     |
| T40603S | Poisoning by unspecified narcotics, assault, sequela                                  |
| T40604A | Poisoning by unspecified narcotics, undetermined, initial encounter                   |
| T40604D | Poisoning by unspecified narcotics, undetermined, subsequent encounter                |
| T40604S | Poisoning by unspecified narcotics, undetermined, sequela                             |
| T40605A | Adverse effect of unspecified narcotics, initial encounter                            |
| T40605D | Adverse effect of unspecified narcotics, subsequent encounter                         |
| T40605S | Adverse effect of unspecified narcotics, sequela                                      |
| T40691A | Poisoning by other narcotics, accidental (unintentional), initial encounter           |
| T40691D | Poisoning by other narcotics, accidental (unintentional), subsequent encounter        |
| T40691S | Poisoning by other narcotics, accidental (unintentional), sequela                     |
| T40692A | Poisoning by other narcotics, intentional self-harm, initial encounter                |
| T40692D | Poisoning by other narcotics, intentional self-harm, subsequent encounter             |
| T40692S | Poisoning by other narcotics, intentional self-harm, sequela                          |
| T40693A | Poisoning by other narcotics, assault, initial encounter                              |
| T40693D | Poisoning by other narcotics, assault, subsequent encounter                           |
| T40693S | Poisoning by other narcotics, assault, sequela                                        |
| T40694A | Poisoning by other narcotics, undetermined, initial encounter                         |
| T40694D | Poisoning by other narcotics, undetermined, subsequent encounter                      |
| T40694S | Poisoning by other narcotics, undetermined, sequela                                   |
| T40695A | Adverse effect of other narcotics, initial encounter                                  |
| T40695D | Adverse effect of other narcotics, subsequent encounter                               |
| T40695S | Adverse effect of other narcotics, sequela                                            |
| T407X1A | Poisoning by cannabis (derivatives), accidental (unintentional), initial encounter    |
| T407X1D | Poisoning by cannabis (derivatives), accidental (unintentional), subsequent encounter |
| T407X1S | Poisoning by cannabis (derivatives), accidental (unintentional), sequela              |
| T407X2A | Poisoning by cannabis (derivatives), intentional self-harm, initial encounter         |
| T407X2D | Poisoning by cannabis (derivatives), intentional self-harm, subsequent encounter      |
| T407X2S | Poisoning by cannabis (derivatives), intentional self-harm, sequela                   |
| T407X3A | Poisoning by cannabis (derivatives), assault, initial encounter                       |
| T407X3D | Poisoning by cannabis (derivatives), assault, subsequent encounter                    |
| T407X3S | Poisoning by cannabis (derivatives), assault, sequela                                 |
| T407X4A | Poisoning by cannabis (derivatives), undetermined, initial encounter                  |
| T407X4D | Poisoning by cannabis (derivatives), undetermined, subsequent encounter               |
| T407X4S | Poisoning by cannabis (derivatives), undetermined, sequela                            |
| T407X5A | Adverse effect of cannabis (derivatives), initial encounter                           |
| T407X5D | Adverse effect of cannabis (derivatives), subsequent encounter                        |
| T407X5S | Adverse effect of cannabis (derivatives), sequela                                     |
| T408X1A | Poisoning by lysergide [LSD], accidental (unintentional), initial encounter           |
| T408X1D | Poisoning by lysergide [LSD], accidental (unintentional), subsequent encounter        |
| T408X1S | Poisoning by lysergide [LSD], accidental (unintentional), sequela                     |

|         |                                                                                                             |
|---------|-------------------------------------------------------------------------------------------------------------|
| T408X2A | Poisoning by lysergide [LSD], intentional self-harm, initial encounter                                      |
| T408X2D | Poisoning by lysergide [LSD], intentional self-harm, subsequent encounter                                   |
| T408X2S | Poisoning by lysergide [LSD], intentional self-harm, sequela                                                |
| T408X3A | Poisoning by lysergide [LSD], assault, initial encounter                                                    |
| T408X3D | Poisoning by lysergide [LSD], assault, subsequent encounter                                                 |
| T408X3S | Poisoning by lysergide [LSD], assault, sequela                                                              |
| T408X4A | Poisoning by lysergide [LSD], undetermined, initial encounter                                               |
| T408X4D | Poisoning by lysergide [LSD], undetermined, subsequent encounter                                            |
| T408X4S | Poisoning by lysergide [LSD], undetermined, sequela                                                         |
| T40901A | Poisoning by unspecified psychodysleptics [hallucinogens], accidental (unintentional), initial encounter    |
| T40901D | Poisoning by unspecified psychodysleptics [hallucinogens], accidental (unintentional), subsequent encounter |
| T40901S | Poisoning by unspecified psychodysleptics [hallucinogens], accidental (unintentional), sequela              |
| T40902A | Poisoning by unspecified psychodysleptics [hallucinogens], intentional self-harm, initial encounter         |
| T40902D | Poisoning by unspecified psychodysleptics [hallucinogens], intentional self-harm, subsequent encounter      |
| T40902S | Poisoning by unspecified psychodysleptics [hallucinogens], intentional self-harm, sequela                   |
| T40903A | Poisoning by unspecified psychodysleptics [hallucinogens], assault, initial encounter                       |
| T40903D | Poisoning by unspecified psychodysleptics [hallucinogens], assault, subsequent encounter                    |
| T40903S | Poisoning by unspecified psychodysleptics [hallucinogens], assault, sequela                                 |
| T40904A | Poisoning by unspecified psychodysleptics [hallucinogens], undetermined, initial encounter                  |
| T40904D | Poisoning by unspecified psychodysleptics [hallucinogens], undetermined, subsequent encounter               |
| T40904S | Poisoning by unspecified psychodysleptics [hallucinogens], undetermined, sequela                            |
| T40905A | Adverse effect of unspecified psychodysleptics [hallucinogens], initial encounter                           |
| T40905D | Adverse effect of unspecified psychodysleptics [hallucinogens], subsequent encounter                        |
| T40905S | Adverse effect of unspecified psychodysleptics [hallucinogens], sequela                                     |
| T40991A | Poisoning by other psychodysleptics [hallucinogens], accidental (unintentional), initial encounter          |
| T40991D | Poisoning by other psychodysleptics [hallucinogens], accidental (unintentional), subsequent encounter       |
| T40991S | Poisoning by other psychodysleptics [hallucinogens], accidental (unintentional), sequela                    |
| T40992A | Poisoning by other psychodysleptics [hallucinogens], intentional self-harm, initial encounter               |
| T40992D | Poisoning by other psychodysleptics [hallucinogens], intentional self-harm, subsequent encounter            |
| T40992S | Poisoning by other psychodysleptics [hallucinogens], intentional self-harm, sequela                         |
| T40993A | Poisoning by other psychodysleptics [hallucinogens], assault, initial encounter                             |
| T40993D | Poisoning by other psychodysleptics [hallucinogens], assault, subsequent encounter                          |
| T40993S | Poisoning by other psychodysleptics [hallucinogens], assault, sequela                                       |
| T40994A | Poisoning by other psychodysleptics [hallucinogens], undetermined, initial encounter                        |
| T40994D | Poisoning by other psychodysleptics [hallucinogens], undetermined, subsequent encounter                     |
| T40994S | Poisoning by other psychodysleptics [hallucinogens], undetermined, sequela                                  |
| T40995A | Adverse effect of other psychodysleptics [hallucinogens], initial encounter                                 |
| T40995D | Adverse effect of other psychodysleptics [hallucinogens], subsequent encounter                              |
| T40995S | Adverse effect of other psychodysleptics [hallucinogens], sequela                                           |

|         |                                                                                                                |
|---------|----------------------------------------------------------------------------------------------------------------|
| T410X1A | Poisoning by inhaled anesthetics, accidental (unintentional), initial encounter                                |
| T410X1D | Poisoning by inhaled anesthetics, accidental (unintentional), subsequent encounter                             |
| T410X1S | Poisoning by inhaled anesthetics, accidental (unintentional), sequela                                          |
| T410X2A | Poisoning by inhaled anesthetics, intentional self-harm, initial encounter                                     |
| T410X2D | Poisoning by inhaled anesthetics, intentional self-harm, subsequent encounter                                  |
| T410X2S | Poisoning by inhaled anesthetics, intentional self-harm, sequela                                               |
| T410X3A | Poisoning by inhaled anesthetics, assault, initial encounter                                                   |
| T410X3D | Poisoning by inhaled anesthetics, assault, subsequent encounter                                                |
| T410X3S | Poisoning by inhaled anesthetics, assault, sequela                                                             |
| T410X4A | Poisoning by inhaled anesthetics, undetermined, initial encounter                                              |
| T410X4D | Poisoning by inhaled anesthetics, undetermined, subsequent encounter                                           |
| T410X4S | Poisoning by inhaled anesthetics, undetermined, sequela                                                        |
| T410X5A | Adverse effect of inhaled anesthetics, initial encounter                                                       |
| T410X5D | Adverse effect of inhaled anesthetics, subsequent encounter                                                    |
| T410X5S | Adverse effect of inhaled anesthetics, sequela                                                                 |
| T411X2S | Poisoning by intravenous anesthetics, intentional self-harm, sequela                                           |
| T41202S | Poisoning by unspecified general anesthetics, intentional self-harm, sequela                                   |
| T41292S | Poisoning by other general anesthetics, intentional self-harm, sequela                                         |
| T413X2S | Poisoning by local anesthetics, intentional self-harm, sequela                                                 |
| T4142XS | Poisoning by unspecified anesthetic, intentional self-harm, sequela                                            |
| T415X2S | Poisoning by therapeutic gases, intentional self-harm, sequela                                                 |
| T420X2S | Poisoning by hydantoin derivatives, intentional self-harm, sequela                                             |
| T422X2S | Poisoning by succinimides and oxazolidinediones, intentional self-harm, sequela                                |
| T423X2S | Poisoning by barbiturates, intentional self-harm, sequela                                                      |
| T424X2S | Poisoning by benzodiazepines, intentional self-harm, sequela                                                   |
| T425X2S | Poisoning by mixed antiepileptics, intentional self-harm, sequela                                              |
| T426X1A | Poisoning by other antiepileptic and sedative-hypnotic drugs, accidental (unintentional), initial encounter    |
| T426X1D | Poisoning by other antiepileptic and sedative-hypnotic drugs, accidental (unintentional), subsequent encounter |
| T426X1S | Poisoning by other antiepileptic and sedative-hypnotic drugs, accidental (unintentional), sequela              |
| T426X2A | Poisoning by other antiepileptic and sedative-hypnotic drugs, intentional self-harm, initial encounter         |
| T426X2D | Poisoning by other antiepileptic and sedative-hypnotic drugs, intentional self-harm, subsequent encounter      |
| T426X2S | Poisoning by other antiepileptic and sedative-hypnotic drugs, intentional self-harm, sequela                   |
| T426X3A | Poisoning by other antiepileptic and sedative-hypnotic drugs, assault, initial encounter                       |
| T426X3D | Poisoning by other antiepileptic and sedative-hypnotic drugs, assault, subsequent encounter                    |
| T426X3S | Poisoning by other antiepileptic and sedative-hypnotic drugs, assault, sequela                                 |
| T426X4A | Poisoning by other antiepileptic and sedative-hypnotic drugs, undetermined, initial encounter                  |
| T426X4D | Poisoning by other antiepileptic and sedative-hypnotic drugs, undetermined, subsequent encounter               |
| T426X4S | Poisoning by other antiepileptic and sedative-hypnotic drugs, undetermined, sequela                            |
| T426X5A | Adverse effect of other antiepileptic and sedative-hypnotic drugs, initial encounter                           |
| T426X5D | Adverse effect of other antiepileptic and sedative-hypnotic drugs, subsequent encounter                        |

|         |                                                                                                                      |
|---------|----------------------------------------------------------------------------------------------------------------------|
| T426X5S | Adverse effect of other antiepileptic and sedative-hypnotic drugs, sequela                                           |
| T4271XA | Poisoning by unspecified antiepileptic and sedative-hypnotic drugs, accidental (unintentional), initial encounter    |
| T4271XD | Poisoning by unspecified antiepileptic and sedative-hypnotic drugs, accidental (unintentional), subsequent encounter |
| T4271XS | Poisoning by unspecified antiepileptic and sedative-hypnotic drugs, accidental (unintentional), sequela              |
| T4272XA | Poisoning by unspecified antiepileptic and sedative-hypnotic drugs, intentional self-harm, initial encounter         |
| T4272XD | Poisoning by unspecified antiepileptic and sedative-hypnotic drugs, intentional self-harm, subsequent encounter      |
| T4272XS | Poisoning by unspecified antiepileptic and sedative-hypnotic drugs, intentional self-harm, sequela                   |
| T4273XA | Poisoning by unspecified antiepileptic and sedative-hypnotic drugs, assault, initial encounter                       |
| T4273XD | Poisoning by unspecified antiepileptic and sedative-hypnotic drugs, assault, subsequent encounter                    |
| T4273XS | Poisoning by unspecified antiepileptic and sedative-hypnotic drugs, assault, sequela                                 |
| T4274XA | Poisoning by unspecified antiepileptic and sedative-hypnotic drugs, undetermined, initial encounter                  |
| T4274XD | Poisoning by unspecified antiepileptic and sedative-hypnotic drugs, undetermined, subsequent encounter               |
| T4274XS | Poisoning by unspecified antiepileptic and sedative-hypnotic drugs, undetermined, sequela                            |
| T4275XA | Adverse effect of unspecified antiepileptic and sedative-hypnotic drugs, initial encounter                           |
| T4275XD | Adverse effect of unspecified antiepileptic and sedative-hypnotic drugs, subsequent encounter                        |
| T4275XS | Adverse effect of unspecified antiepileptic and sedative-hypnotic drugs, sequela                                     |
| T428X2S | Poisoning by antiparkinsonism drugs and other central muscle-tone depressants, intentional self-harm, sequela        |
| T43012S | Poisoning by tricyclic antidepressants, intentional self-harm, sequela                                               |
| T43022S | Poisoning by tetracyclic antidepressants, intentional self-harm, sequela                                             |
| T431X2S | Poisoning by monoamine-oxidase-inhibitor antidepressants, intentional self-harm, sequela                             |
| T43202S | Poisoning by unspecified antidepressants, intentional self-harm, sequela                                             |
| T43205S | Adverse effect of unspecified antidepressants, sequela                                                               |
| T43212S | Poisoning by selective serotonin and norepinephrine reuptake inhibitors, intentional self-harm, sequela              |
| T43222S | Poisoning by selective serotonin reuptake inhibitors, intentional self-harm, sequela                                 |
| T43292S | Poisoning by other antidepressants, intentional self-harm, sequela                                                   |
| T433X2S | Poisoning by phenothiazine antipsychotics and neuroleptics, intentional self-harm, sequela                           |
| T434X2S | Poisoning by butyrophenone and thiothixene neuroleptics, intentional self-harm, sequela                              |
| T43502S | Poisoning by unspecified antipsychotics and neuroleptics, intentional self-harm, sequela                             |
| T43592S | Poisoning by other antipsychotics and neuroleptics, intentional self-harm, sequela                                   |
| T43601A | Poisoning by unspecified psychostimulants, accidental (unintentional), initial encounter                             |
| T43601D | Poisoning by unspecified psychostimulants, accidental (unintentional), subsequent encounter                          |
| T43601S | Poisoning by unspecified psychostimulants, accidental (unintentional), sequela                                       |
| T43602A | Poisoning by unspecified psychostimulants, intentional self-harm, initial encounter                                  |
| T43602D | Poisoning by unspecified psychostimulants, intentional self-harm, subsequent encounter                               |
| T43602S | Poisoning by unspecified psychostimulants, intentional self-harm, sequela                                            |
| T43603A | Poisoning by unspecified psychostimulants, assault, initial encounter                                                |
| T43603D | Poisoning by unspecified psychostimulants, assault, subsequent encounter                                             |
| T43603S | Poisoning by unspecified psychostimulants, assault, sequela                                                          |

|         |                                                                                |
|---------|--------------------------------------------------------------------------------|
| T43604A | Poisoning by unspecified psychostimulants, undetermined, initial encounter     |
| T43604D | Poisoning by unspecified psychostimulants, undetermined, subsequent encounter  |
| T43604S | Poisoning by unspecified psychostimulants, undetermined, sequela               |
| T43605A | Adverse effect of unspecified psychostimulants, initial encounter              |
| T43605D | Adverse effect of unspecified psychostimulants, subsequent encounter           |
| T43605S | Adverse effect of unspecified psychostimulants, sequela                        |
| T43611A | Poisoning by caffeine, accidental (unintentional), initial encounter           |
| T43611D | Poisoning by caffeine, accidental (unintentional), subsequent encounter        |
| T43611S | Poisoning by caffeine, accidental (unintentional), sequela                     |
| T43612A | Poisoning by caffeine, intentional self-harm, initial encounter                |
| T43612D | Poisoning by caffeine, intentional self-harm, subsequent encounter             |
| T43612S | Poisoning by caffeine, intentional self-harm, sequela                          |
| T43613A | Poisoning by caffeine, assault, initial encounter                              |
| T43613D | Poisoning by caffeine, assault, subsequent encounter                           |
| T43613S | Poisoning by caffeine, assault, sequela                                        |
| T43614A | Poisoning by caffeine, undetermined, initial encounter                         |
| T43614D | Poisoning by caffeine, undetermined, subsequent encounter                      |
| T43614S | Poisoning by caffeine, undetermined, sequela                                   |
| T43615A | Adverse effect of caffeine, initial encounter                                  |
| T43615D | Adverse effect of caffeine, subsequent encounter                               |
| T43615S | Adverse effect of caffeine, sequela                                            |
| T43621A | Poisoning by amphetamines, accidental (unintentional), initial encounter       |
| T43621D | Poisoning by amphetamines, accidental (unintentional), subsequent encounter    |
| T43621S | Poisoning by amphetamines, accidental (unintentional), sequela                 |
| T43622A | Poisoning by amphetamines, intentional self-harm, initial encounter            |
| T43622D | Poisoning by amphetamines, intentional self-harm, subsequent encounter         |
| T43622S | Poisoning by amphetamines, intentional self-harm, sequela                      |
| T43623A | Poisoning by amphetamines, assault, initial encounter                          |
| T43623D | Poisoning by amphetamines, assault, subsequent encounter                       |
| T43623S | Poisoning by amphetamines, assault, sequela                                    |
| T43624A | Poisoning by amphetamines, undetermined, initial encounter                     |
| T43624D | Poisoning by amphetamines, undetermined, subsequent encounter                  |
| T43624S | Poisoning by amphetamines, undetermined, sequela                               |
| T43625A | Adverse effect of amphetamines, initial encounter                              |
| T43625D | Adverse effect of amphetamines, subsequent encounter                           |
| T43625S | Adverse effect of amphetamines, sequela                                        |
| T43631A | Poisoning by methylphenidate, accidental (unintentional), initial encounter    |
| T43631D | Poisoning by methylphenidate, accidental (unintentional), subsequent encounter |
| T43631S | Poisoning by methylphenidate, accidental (unintentional), sequela              |
| T43632A | Poisoning by methylphenidate, intentional self-harm, initial encounter         |
| T43632D | Poisoning by methylphenidate, intentional self-harm, subsequent encounter      |
| T43632S | Poisoning by methylphenidate, intentional self-harm, sequela                   |
| T43633A | Poisoning by methylphenidate, assault, initial encounter                       |
| T43633D | Poisoning by methylphenidate, assault, subsequent encounter                    |
| T43633S | Poisoning by methylphenidate, assault, sequela                                 |

|         |                                                                                       |
|---------|---------------------------------------------------------------------------------------|
| T43634A | Poisoning by methylphenidate, undetermined, initial encounter                         |
| T43634D | Poisoning by methylphenidate, undetermined, subsequent encounter                      |
| T43634S | Poisoning by methylphenidate, undetermined, sequela                                   |
| T43635A | Adverse effect of methylphenidate, initial encounter                                  |
| T43635D | Adverse effect of methylphenidate, subsequent encounter                               |
| T43635S | Adverse effect of methylphenidate, sequela                                            |
| T43641A | Poisoning by ecstasy, accidental (unintentional), initial encounter                   |
| T43641D | Poisoning by ecstasy, accidental (unintentional), subsequent encounter                |
| T43641S | Poisoning by ecstasy, accidental (unintentional), sequela                             |
| T43642A | Poisoning by ecstasy, intentional self-harm, initial encounter                        |
| T43642D | Poisoning by ecstasy, intentional self-harm, subsequent encounter                     |
| T43642S | Poisoning by ecstasy, intentional self-harm, sequela                                  |
| T43643A | Poisoning by ecstasy, assault, initial encounter                                      |
| T43643D | Poisoning by ecstasy, assault, subsequent encounter                                   |
| T43643S | Poisoning by ecstasy, assault, sequela                                                |
| T43644A | Poisoning by ecstasy, undetermined, initial encounter                                 |
| T43644D | Poisoning by ecstasy, undetermined, subsequent encounter                              |
| T43644S | Poisoning by ecstasy, undetermined, sequela                                           |
| T43691A | Poisoning by other psychostimulants, accidental (unintentional), initial encounter    |
| T43691D | Poisoning by other psychostimulants, accidental (unintentional), subsequent encounter |
| T43691S | Poisoning by other psychostimulants, accidental (unintentional), sequela              |
| T43692A | Poisoning by other psychostimulants, intentional self-harm, initial encounter         |
| T43692D | Poisoning by other psychostimulants, intentional self-harm, subsequent encounter      |
| T43692S | Poisoning by other psychostimulants, intentional self-harm, sequela                   |
| T43693A | Poisoning by other psychostimulants, assault, initial encounter                       |
| T43693D | Poisoning by other psychostimulants, assault, subsequent encounter                    |
| T43693S | Poisoning by other psychostimulants, assault, sequela                                 |
| T43694A | Poisoning by other psychostimulants, undetermined, initial encounter                  |
| T43694D | Poisoning by other psychostimulants, undetermined, subsequent encounter               |
| T43694S | Poisoning by other psychostimulants, undetermined, sequela                            |
| T43695A | Adverse effect of other psychostimulants, initial encounter                           |
| T43695D | Adverse effect of other psychostimulants, subsequent encounter                        |

## Tobacco use

F17.xxx, Z716, Z720

### **eAppendix 3. Prescriber Types**

We identified combinations of primary and secondary provider taxonomy codes corresponding to the following prescriber types:

- Family medicine physicians
- Internists
- Pain medicine physicians
- Emergency medicine physicians (including pediatric emergency medicine)
- Obstetricians/gynecologists
- Physical medicine and rehabilitation physicians (excludes pain medicine)
- Surgeons (general, surgical critical care, hand, pediatric, trauma, vascular, surgical oncology, colorectal, thoracic, orthopedic, oral maxillofacial surgery, plastic surgery, neurosurgery, ophthalmology, otolaryngology, urology)
- Psychiatrists (excludes pain medicine)
- Neurologists (excludes pain medicine)
- Other physicians (independent medical examiner, phlebology, neuromuscular medicine, electrodiagnostic medicine, allergy and immunology, medical genetics, nuclear medicine, pathology, pediatrics, preventive medicine, radiology, general practice, clinical pharmacology, legal medicine)
- Physician assistant
- Nurse practitioner
- Dentist
- Podiatrist
- All other providers



**eTable 3.** Adjusted Association Between Overlapping Opioid And Benzodiazepine Prescriptions From Multiple Prescribers and Overdose

| Exposure or Covariate                                                                                | Adjusted odds ratio (95% CI) | Average marginal effect (95% CI) |
|------------------------------------------------------------------------------------------------------|------------------------------|----------------------------------|
| Multiple prescribers accounting for overlapping opioid and benzodiazepine prescriptions (versus one) | 1.20 (1.10, 1.31)            | 0.91 (0.46, 1.37)                |
| Daily MME category (vs < 30)                                                                         |                              |                                  |
| 30-59                                                                                                | 1.21 (1.06, 1.38)            | 0.85 (0.26, 1.44)                |
| 60-89                                                                                                | 1.23 (1.05, 1.44)            | 0.95 (0.23, 1.66)                |
| 90-119                                                                                               | 1.70 (1.42, 2.04)            | 2.87 (1.84, 3.89)                |
| ≥120                                                                                                 | 1.35 (1.13, 1.61)            | 1.41 (0.57, 2.26)                |
| Daily DME category (vs <10)                                                                          |                              |                                  |
| 11-20                                                                                                | 1.21 (1.06, 1.37)            | 0.80 (0.24, 1.36)                |
| 21-30                                                                                                | 1.38 (1.20, 1.58)            | 1.46 (0.82, 2.10)                |
| 31-40                                                                                                | 1.52 (1.30, 1.76)            | 2.00 (1.23, 2.78)                |
| ≥40                                                                                                  | 1.79 (1.53, 2.09)            | 3.08 (2.15, 4.01)                |
| Extended-release/long-acting opioid use (vs none)                                                    | 1.23 (1.07, 1.41)            | 1.04 (0.34, 1.74)                |
| Mental health disorder (vs none)                                                                     | 1.38 (1.03, 1.85)            | 1.64 (0.13, 3.14)                |
| Substance use disorder (vs none)                                                                     | 40.78 (34.65, 48.00)         | 18.83 (17.57, 20.09)             |
| Tobacco use (versus none)                                                                            | 1.22 (1.10, 1.35)            | 0.99 (0.47, 1.52)                |
| Cancer (vs none)                                                                                     | 0.88 (0.78, 0.99)            | -0.64 (-1.23, -0.05)             |
| Number of Elixhauser co-morbidity flags                                                              | 1.13 (1.12, 1.14)            | 0.62 (0.55, 0.69)                |
| Age in single years                                                                                  | 1.00 (1.00, 1.00)            | 0.00 (-0.02, 0.02)               |
| Male (vs female)                                                                                     | 0.74 (0.67, 0.82)            | -1.45 (-1.91, -0.98)             |
| US Census region (vs Northeast)                                                                      |                              |                                  |
| Midwest                                                                                              | 1.03 (0.83, 1.27)            | 0.13 (-0.92, 1.18)               |
| South                                                                                                | 1.02 (0.84, 1.24)            | 0.10 (-0.84, 1.05)               |
| West                                                                                                 | 1.20 (0.95, 1.51)            | 0.96 (-0.23, 2.14)               |
| Medicare Advantage (vs commercial insurance)                                                         | 1.02 (0.90, 1.15)            | 0.08 (-0.54, 0.71)               |
| Person-day occurred in 2018 (vs 2017)                                                                | 0.91 (0.83, 1.00)            | -0.46 (-0.93, 0.01)              |

**eTable 4.** Sensitivity Analyses

| Analysis                                                                                                                        | # person-days included in analysis | Adjusted odds ratio (95% CI) | Average marginal effect of exposure per 100,000 person-days of overlap (95% CI) |
|---------------------------------------------------------------------------------------------------------------------------------|------------------------------------|------------------------------|---------------------------------------------------------------------------------|
| Main analysis                                                                                                                   | 52,989,316                         | 1.20 (1.10, 1.31)            | 0.91 (0.46, 1.37)                                                               |
| Exclude person-days of overlap involving prescriptions from a pain medicine physician                                           | 45,847,909                         | 1.20 (1.09, 1.33)            | 0.87 (0.39, 1.35)                                                               |
| Excluded person-days involving any buprenorphine formulation                                                                    | 51,764,768                         | 1.18 (1.08, 1.29)            | 0.85 (0.40, 1.31)                                                               |
| Excluded patients with cancer diagnosis in the 365 days prior to cohort entry                                                   | 38,564,767                         | 1.16 (1.04, 1.28)            | 0.72 (0.21, 1.22)                                                               |
| Excluded patients with substance use disorder diagnosis in the 365 days prior to cohort entry                                   | 43,416,173                         | 1.61 (1.18, 2.18)            | 0.21 (0.07, 0.34)                                                               |
| Control for number of days since the beginning of an episode of opioid-benzodiazepine overlap                                   | 52,989,316                         | 1.19 (1.09, 1.30)            | 0.88 (0.43, 1.33)                                                               |
| Used flexible, non-parametric thin-plate smoothing spline function rather than model daily MME and DME as categorical variables | 52,989,316                         | 1.21 (1.12-1.30)             | N/A [R software package could not calculate AME when splines were used]         |
| Did not control for daily MME, daily DME, or use of extended-release/long-acting opioids                                        | 52,989,316                         | 1.27 (1.17, 1.39)            | 1.23 (0.77, 1.69)                                                               |

Sensitivity analysis in which exposure variable was a categorical variable for 1, 2, and  $\geq 3$  prescribers instead of 1 versus more than 1

In this sensitivity analysis, covariates were the same as in the main analysis. Adjusted results for the new exposure variable are below

|                      | AOR (95% CI)      | AME (95% CI)      |
|----------------------|-------------------|-------------------|
| 1 prescriber         | Ref               | Ref               |
| 2 prescribers        | 1.18 (1.08, 1.29) | 0.83 (0.38, 1.29) |
| $\geq 3$ prescribers | 1.55 (1.24, 1.96) | 2.57 (0.98, 4.15) |
